# Supplementary material for: Activation of MET via Diverse Exon 14 Splicing Alterations Occurs in Multiple Tumor Types and Confers Clinical Sensitivity to MET Inhibitors
Source: Oxford University Press journal article supplement (doi:10.1158/2159-8290.cd-15-0285), 2015-05-13
Supplement: 21598290cd150285-sup-146191_1_supp_2964911_nn1y13.xlsx [file 21598290cd150285-sup-146191_1_supp_2964911_nn1y13.xlsx]

## Sheet: TABLE S1
MANUSCRIPT	SPECIMEN ID NUMBER	CHROMOSOME	START POSITION	END POSITION	REFERENCE SEQUENCE	ALTERNATE SEQUENCE
Kong-Beltran et al. 2006	pat. 14	chr7	116411875	116411897	AAGCTCTTTCTTTCTCTCTGTT	-
Kong-Beltran et al. 2006	pat. 16	chr7	116412022	116412050	ACCGAGCTACTTTTCCAGAAGGTATATT	-
Kong-Beltran et al. 2006	H596	chr7	116412043	116412044	G	T
Onozato et al, 2009	T1165	chr7	116411854	116411874	CCCATGATAGCCGTCTTTAA	-
Onozato et al, 2009	T1307	chr7	116411884	116411895	CTTTCTCTCTG	-
Onozato et al, 2009	T1148	chr7	116411886	116411905	TTCTCTCTGTTTTAAGATC	-
Onozato et al, 2009	T1021	chr7	116412043	116412044	G	A
Asaoka et al. 2010	hs746T	chr7	116412043	116412044	G	T
Cancer Genome Atlas Research Network, 2014	TCGA-50-6597-01A-11D-1855-08	chr7	116412041	116412045	AGGT	-
Cancer Genome Atlas Research Network, 2014	TCGA-55-6982-01A-11D-1945-08	chr7	116412041	116412047	AGGTAT	-
Cancer Genome Atlas Research Network, 2014	TCGA-J2-A4AE-01A-21D-A24D-08	chr7	116412042	116412043	G	-
Cancer Genome Atlas Research Network, 2014	TCGA-49-6745-01A-11D-1855-08	chr7	116412043	116412044	G	T
Cancer Genome Atlas Research Network, 2014	TCGA-93-7348-01A-21D-2036-08	chr7	116412043	116412044	G	A
Cancer Genome Atlas Research Network, 2014	TCGA-44-A47G-01A-21D-A24D-08	chr7	116412044	116412045	T	G
Cancer Genome Atlas Research Network, 2014	TCGA-75-5122-01A-01D-1753-08	chr7	116412044	116412045	T	C
Jenkins et al, 2015	-	chr7	116411884	116411896	CTTTCTCTCTGT	-
Waqar et al, 2015	-	chr7	116412042	116412043	G	C
Mendenhall and Goldman, 2015	-	chr7	116412042	116412043	G	C
