# Supplementary material for: Activation of MET via Diverse Exon 14 Splicing Alterations Occurs in Multiple Tumor Types and Confers Clinical Sensitivity to MET Inhibitors
Source: Oxford University Press journal article supplement (doi:10.1158/2159-8290.cd-15-0285), 2015-05-13
Supplement: 21598290cd150285-sup-146191_1_supp_2964914_nnhyh3.xlsx [file 21598290cd150285-sup-146191_1_supp_2964914_nnhyh3.xlsx]

## Sheet: TABLE S4
GENE A	GENE A COUNT	GENE B	GENE B COUNT	CO-OCCURRENCE COUNT	RANDOM CO-OCCURRENCE EXPECTED COUNT	FALSE DISCOVERY RATE
KRAS	1353	KRAS_AMP	141	89	43.3378	1.91052e-14
KRAS	1353	EGFR	878	13	269.862	1.78887e-132
KRAS	1353	EGFR_AMP	266	9	81.7578	2.08377e-29
KRAS	1353	ERBB2	180	2	55.3249	6.47439e-25
KRAS	1353	ERBB2_AMP	132	15	40.5716	9.91502e-07
KRAS	1353	MET	137	4	42.1084	1.32972e-15
KRAS	1353	MET_AMP	119	12	36.5759	6.81353e-07
KRAS	1353	BRAF	259	19	79.6063	2.21494e-19
KRAS	1353	PIK3CA	249	69	76.5327	0.460581
KRAS	1353	ALK	200	4	61.4721	3.15286e-25
KRAS	1353	RET	104	12	31.9655	2.5634e-05
KRAS	1353	ROS1	79	6	24.2815	5.3841e-06
KRAS	1353	TP53	2353	584	723.219	2.76517e-18
KRAS	1353	CDKN2A	1000	268	307.36	0.00678327
KRAS	1353	CDKN2B	668	162	205.317	0.000324456
KRAS	1353	STK11	690	354	212.079	4.25239e-33
KRAS	1353	LRP1B	332	135	102.044	0.000321315
KRAS	1353	ARID1A	281	94	86.3682	0.455577
KRAS	1353	NF1	270	48	82.9873	5.16583e-06
KRAS	1353	PTEN	113	19	34.7317	0.00313612
KRAS	1353	ATM	227	129	69.7708	1.75187e-15
KRAS	1353	SMARCA4	230	67	70.6929	0.713725
KRAS	1353	RB1	227	43	69.7708	0.000221108
KRAS	1353	KEAP1	271	120	83.2946	7.45959e-06
KRAS	1353	CTNNB1	197	39	60.55	0.00180351
KRAS	1353	MYC	417	123	128.169	0.691697
KRAS	1353	NKX2-1	432	140	132.78	0.579103
KRAS	1353	MCL1	353	108	108.498	1
KRAS	1353	MDM2	269	29	82.6799	4.2488e-14
KRAS	1353	CCND1	134	41	41.1863	1
KRAS	1353	CCNE1	162	29	49.7924	0.000985044
EGFR	878	EGFR_AMP	266	206	53.055	5.04294e-96
EGFR	878	ERBB2	180	11	35.9019	1.12286e-06
EGFR	878	ERBB2_AMP	132	26	26.328	1
EGFR	878	MET	137	2	27.3253	6.13261e-10
EGFR	878	MET_AMP	119	21	23.7351	0.74844
EGFR	878	BRAF	259	12	51.6588	6.89025e-12
EGFR	878	PIK3CA	249	79	49.6642	3.22923e-05
EGFR	878	ALK	200	3	39.891	1.22556e-14
EGFR	878	RET	104	4	20.7433	1.46871e-05
EGFR	878	ROS1	79	4	15.7569	0.00118207
EGFR	878	TP53	2353	540	469.317	6.73874e-07
EGFR	878	CDKN2A	1000	216	199.455	0.242963
EGFR	878	CDKN2B	668	177	133.236	4.0779e-05
EGFR	878	STK11	690	24	137.624	6.35766e-40
EGFR	878	LRP1B	332	17	66.219	3.87022e-14
EGFR	878	ARID1A	281	30	56.0468	0.000141744
EGFR	878	NF1	270	16	53.8528	3.90878e-10
EGFR	878	PTEN	113	30	22.5384	0.176337
EGFR	878	ATM	227	31	45.2762	0.0345161
EGFR	878	SMARCA4	230	13	45.8746	5.36117e-09
EGFR	878	RB1	227	84	45.2762	1.07347e-08
EGFR	878	KEAP1	271	9	54.0522	4.23411e-15
EGFR	878	CTNNB1	197	84	39.2926	1.40342e-12
EGFR	878	MYC	417	86	83.1726	0.79341
EGFR	878	NKX2-1	432	147	86.1645	5.41085e-12
EGFR	878	MCL1	353	60	70.4075	0.277457
EGFR	878	MDM2	269	90	53.6533	6.79496e-07
EGFR	878	CCND1	134	33	26.7269	0.304759
EGFR	878	CCNE1	162	58	32.3117	1.01458e-05
ERBB2	180	ERBB2_AMP	132	26	5.39755	9.90531e-11
ERBB2	180	MET	137	0	5.602	0.0189262
ERBB2	180	MET_AMP	119	1	4.86597	0.176828
ERBB2	180	BRAF	259	0	10.5906	0.000141581
ERBB2	180	PIK3CA	249	9	10.1817	0.938158
ERBB2	180	ALK	200	0	8.1781	0.00135721
ERBB2	180	RET	104	0	4.25261	0.0517479
ERBB2	180	ROS1	79	0	3.23035	0.15374
ERBB2	180	TP53	2353	93	96.2154	0.753248
ERBB2	180	CDKN2A	1000	49	40.8905	0.252705
ERBB2	180	CDKN2B	668	31	27.3149	0.591138
ERBB2	180	STK11	690	5	28.2144	1.94716e-07
ERBB2	180	LRP1B	332	7	13.5756	0.124723
ERBB2	180	ARID1A	281	12	11.4902	0.940658
ERBB2	180	NF1	270	3	11.0404	0.0185502
ERBB2	180	PTEN	113	7	4.62063	0.357833
ERBB2	180	ATM	227	6	9.28214	0.445286
ERBB2	180	SMARCA4	230	5	9.40482	0.28327
ERBB2	180	RB1	227	16	9.28214	0.0787558
ERBB2	180	KEAP1	271	2	11.0813	0.0044074
ERBB2	180	CTNNB1	197	8	8.05543	1
ERBB2	180	MYC	417	14	17.0513	0.642191
ERBB2	180	NKX2-1	432	35	17.6647	0.000265495
ERBB2	180	MCL1	353	12	14.4343	0.692286
ERBB2	180	MDM2	269	13	10.9995	0.645779
ERBB2	180	CCND1	134	4	5.47933	0.763315
ERBB2	180	CCNE1	162	5	6.62426	0.785931
MET	137	MET_AMP	119	17	3.70354	6.97492e-07
MET	137	BRAF	259	0	8.06065	0.00132277
MET	137	PIK3CA	249	7	7.74943	1
MET	137	ALK	200	0	6.22444	0.0086431
MET	137	RET	104	1	3.23671	0.516904
MET	137	ROS1	79	1	2.45866	0.644328
MET	137	TP53	2353	46	73.2306	1.25219e-05
MET	137	CDKN2A	1000	33	31.1222	0.781464
MET	137	CDKN2B	668	24	20.7896	0.602056
MET	137	STK11	690	2	21.4743	2.37238e-07
MET	137	LRP1B	332	2	10.3326	0.00842094
MET	137	ARID1A	281	6	8.74534	0.608009
MET	137	NF1	270	4	8.403	0.251089
MET	137	PTEN	113	1	3.51681	0.400702
MET	137	ATM	227	5	7.06474	0.673272
MET	137	SMARCA4	230	3	7.15811	0.215963
MET	137	RB1	227	5	7.06474	0.671268
MET	137	KEAP1	271	0	8.43412	0.000900282
MET	137	CTNNB1	197	0	6.13108	0.00866562
MET	137	MYC	417	12	12.978	0.942996
MET	137	NKX2-1	432	4	13.4448	0.00963053
MET	137	MCL1	353	6	10.9861	0.253721
MET	137	MDM2	269	57	8.37188	4.09611e-33
MET	137	CCND1	134	6	4.17038	0.449762
MET	137	CCNE1	162	3	5.0418	0.615812
BRAF	259	PIK3CA	249	17	14.6504	0.61747
BRAF	259	ALK	200	1	11.7674	0.000389931
BRAF	259	RET	104	1	6.11904	0.0692429
BRAF	259	ROS1	79	2	4.64811	0.465619
BRAF	259	TP53	2353	138	138.443	1
BRAF	259	CDKN2A	1000	43	58.8369	0.0370356
BRAF	259	CDKN2B	668	29	39.303	0.148856
BRAF	259	STK11	690	42	40.5975	0.875873
BRAF	259	LRP1B	332	13	19.5338	0.25077
BRAF	259	ARID1A	281	21	16.5332	0.368835
BRAF	259	NF1	270	18	15.886	0.696921
BRAF	259	PTEN	113	9	6.64857	0.451215
BRAF	259	ATM	227	15	13.356	0.764381
BRAF	259	SMARCA4	230	9	13.5325	0.380954
BRAF	259	RB1	227	4	13.356	0.0104968
BRAF	259	KEAP1	271	17	15.9448	0.875532
BRAF	259	CTNNB1	197	8	11.5909	0.487787
BRAF	259	MYC	417	28	24.535	0.579212
BRAF	259	NKX2-1	432	19	25.4175	0.312972
BRAF	259	MCL1	353	24	20.7694	0.548765
BRAF	259	MDM2	269	6	15.8271	0.0192567
BRAF	259	CCND1	134	7	7.88414	1
BRAF	259	CCNE1	162	3	9.53158	0.0576505
PIK3CA	249	ALK	200	4	11.313	0.0432738
PIK3CA	249	RET	104	2	5.88278	0.230685
PIK3CA	249	ROS1	79	0	4.46865	0.052533
PIK3CA	249	TP53	2353	141	133.098	0.465332
PIK3CA	249	CDKN2A	1000	54	56.5652	0.849694
PIK3CA	249	CDKN2B	668	41	37.7856	0.69454
PIK3CA	249	STK11	690	9	39.03	8.6977e-09
PIK3CA	249	LRP1B	332	21	18.7796	0.656139
PIK3CA	249	ARID1A	281	23	15.8948	0.126851
PIK3CA	249	NF1	270	19	15.2726	0.478157
PIK3CA	249	PTEN	113	9	6.39187	0.438472
PIK3CA	249	ATM	227	12	12.8403	1
PIK3CA	249	SMARCA4	230	9	13.01	0.444874
PIK3CA	249	RB1	227	35	12.8403	2.10221e-07
PIK3CA	249	KEAP1	271	10	15.3292	0.288444
PIK3CA	249	CTNNB1	197	14	11.1433	0.481438
PIK3CA	249	MYC	417	18	23.5877	0.401707
PIK3CA	249	NKX2-1	432	15	24.4362	0.080328
PIK3CA	249	MCL1	353	14	19.9675	0.303151
PIK3CA	249	MDM2	269	23	15.216	0.087336
PIK3CA	249	CCND1	134	4	7.57974	0.382224
PIK3CA	249	CCNE1	162	11	9.16356	0.618913
ALK	200	RET	104	0	4.72512	0.0371272
ALK	200	ROS1	79	0	3.58928	0.104947
ALK	200	TP53	2353	53	106.906	5.97825e-14
ALK	200	CDKN2A	1000	65	45.4339	0.00443818
ALK	200	CDKN2B	668	53	30.3498	0.00014265
ALK	200	STK11	690	6	31.3494	5.46895e-08
ALK	200	LRP1B	332	2	15.0841	0.000140513
ALK	200	ARID1A	281	11	12.7669	0.85957
ALK	200	NF1	270	1	12.2672	0.000280783
ALK	200	PTEN	113	3	5.13403	0.614969
ALK	200	ATM	227	5	10.3135	0.183287
ALK	200	SMARCA4	230	2	10.4498	0.00883172
ALK	200	RB1	227	1	10.3135	0.001666
ALK	200	KEAP1	271	3	12.3126	0.00735177
ALK	200	CTNNB1	197	3	8.95048	0.0751099
ALK	200	MYC	417	8	18.9459	0.0128306
ALK	200	NKX2-1	432	5	19.6274	0.000338202
ALK	200	MCL1	353	4	16.0382	0.00162831
ALK	200	MDM2	269	5	12.2217	0.0540578
ALK	200	CCND1	134	2	6.08814	0.173878
ALK	200	CCNE1	162	1	7.36029	0.0190141
RET	104	ROS1	79	0	1.86642	0.400305
RET	104	TP53	2353	36	55.5911	0.000563196
RET	104	CDKN2A	1000	31	23.6256	0.179429
RET	104	CDKN2B	668	26	15.7819	0.0219025
RET	104	STK11	690	5	16.3017	0.00321181
RET	104	LRP1B	332	4	7.84371	0.303861
RET	104	ARID1A	281	6	6.6388	1
RET	104	NF1	270	5	6.37892	0.908596
RET	104	PTEN	113	1	2.6697	0.644515
RET	104	ATM	227	5	5.36302	1
RET	104	SMARCA4	230	2	5.43389	0.289432
RET	104	RB1	227	3	5.36302	0.510087
RET	104	KEAP1	271	3	6.40254	0.336731
RET	104	CTNNB1	197	5	4.65425	0.887526
RET	104	MYC	417	13	9.85189	0.44569
RET	104	NKX2-1	432	7	10.2063	0.540187
RET	104	MCL1	353	5	8.33985	0.41215
RET	104	MDM2	269	15	6.35529	0.00477881
RET	104	CCND1	134	0	3.16583	0.153402
RET	104	CCNE1	162	3	3.82735	1
ROS1	79	TP53	2353	36	42.2279	0.286886
ROS1	79	CDKN2A	1000	24	17.9464	0.192416
ROS1	79	CDKN2B	668	14	11.9882	0.645426
ROS1	79	STK11	690	4	12.383	0.0198042
ROS1	79	LRP1B	332	1	5.9582	0.0654235
ROS1	79	ARID1A	281	1	5.04294	0.126055
ROS1	79	NF1	270	1	4.84552	0.174747
ROS1	79	PTEN	113	3	2.02794	0.592481
ROS1	79	ATM	227	3	4.07383	0.880245
ROS1	79	SMARCA4	230	1	4.12767	0.229677
ROS1	79	RB1	227	1	4.07383	0.307291
ROS1	79	KEAP1	271	1	4.86347	0.174612
ROS1	79	CTNNB1	197	7	3.53544	0.171479
ROS1	79	MYC	417	5	7.48364	0.575992
ROS1	79	NKX2-1	432	3	7.75284	0.164591
ROS1	79	MCL1	353	2	6.33507	0.173877
ROS1	79	MDM2	269	1	4.82758	0.174928
ROS1	79	CCND1	134	1	2.40482	0.642511
ROS1	79	CCNE1	162	1	2.90731	0.506716
NO DRIVER	1067	TP53	2353	679	570.343	2.65569e-13
NO DRIVER	1067	CDKN2A	1000	249	242.39	0.692947
NO DRIVER	1067	CDKN2B	668	135	161.916	0.0220729
NO DRIVER	1067	STK11	690	236	167.249	1.53879e-09
NO DRIVER	1067	LRP1B	332	129	80.4734	8.97356e-09
NO DRIVER	1067	ARID1A	281	84	68.1115	0.0583471
NO DRIVER	1067	NF1	270	152	65.4453	8.93618e-30
NO DRIVER	1067	PTEN	113	38	27.39	0.0583787
NO DRIVER	1067	ATM	227	31	55.0225	0.000297233
NO DRIVER	1067	SMARCA4	230	109	55.7497	1.00046e-13
NO DRIVER	1067	RB1	227	46	55.0225	0.29059
NO DRIVER	1067	KEAP1	271	91	65.6876	0.00129304
NO DRIVER	1067	CTNNB1	197	49	47.7508	0.936407
NO DRIVER	1067	MYC	417	101	101.077	1
NO DRIVER	1067	NKX2-1	432	65	104.712	7.01582e-06
NO DRIVER	1067	MCL1	353	115	85.5636	0.000888832
NO DRIVER	1067	MDM2	269	47	65.2029	0.0189316
NO DRIVER	1067	CCND1	134	42	32.4802	0.13189
NO DRIVER	1067	CCNE1	162	46	39.2672	0.352996
TP53	2353	CDKN2A	1000	542	534.53	0.718059
TP53	2353	CDKN2B	668	321	357.066	0.0077745
TP53	2353	STK11	690	295	368.826	9.03286e-09
TP53	2353	LRP1B	332	245	177.464	6.03361e-14
TP53	2353	ARID1A	281	178	150.203	0.00236943
TP53	2353	NF1	270	192	144.323	1.05705e-08
TP53	2353	PTEN	113	71	60.4019	0.0961115
TP53	2353	ATM	227	65	121.338	1.69723e-13
TP53	2353	SMARCA4	230	142	122.942	0.026152
TP53	2353	RB1	227	199	121.338	6.52419e-28
TP53	2353	KEAP1	271	138	144.858	0.551019
TP53	2353	CTNNB1	197	72	105.302	7.33888e-06
TP53	2353	MYC	417	279	222.899	5.52648e-08
TP53	2353	NKX2-1	432	282	230.917	1.30128e-06
TP53	2353	MCL1	353	229	188.689	4.22848e-05
TP53	2353	MDM2	269	51	143.789	2.73994e-31
TP53	2353	CCND1	134	88	71.627	0.0138832
TP53	2353	CCNE1	162	123	86.5938	2.4066e-08
CDKN2A	1000	CDKN2B	668	658	151.749	NA
CDKN2A	1000	STK11	690	175	156.747	0.15052
CDKN2A	1000	LRP1B	332	95	75.4203	0.0256069
CDKN2A	1000	ARID1A	281	68	63.8346	0.669968
CDKN2A	1000	NF1	270	62	61.3358	0.991533
CDKN2A	1000	PTEN	113	38	25.6701	0.0228325
CDKN2A	1000	ATM	227	35	51.5675	0.019698
CDKN2A	1000	SMARCA4	230	83	52.249	1.30889e-05
CDKN2A	1000	RB1	227	12	51.5675	5.33318e-12
CDKN2A	1000	KEAP1	271	86	61.5629	0.00159246
CDKN2A	1000	CTNNB1	197	59	44.7524	0.0375909
CDKN2A	1000	MYC	417	76	94.7297	0.0534225
CDKN2A	1000	NKX2-1	432	75	98.1372	0.0132924
CDKN2A	1000	MCL1	353	67	80.1908	0.166875
CDKN2A	1000	MDM2	269	60	61.1086	0.994012
CDKN2A	1000	CCND1	134	27	30.4407	0.648578
CDKN2A	1000	CCNE1	162	41	36.8015	0.578439
CDKN2B	668	STK11	690	115	104.707	0.37954
CDKN2B	668	LRP1B	332	49	50.3807	0.94103
CDKN2B	668	ARID1A	281	42	42.6415	1
CDKN2B	668	NF1	270	42	40.9723	0.934659
CDKN2B	668	PTEN	113	25	17.1477	0.0964912
CDKN2B	668	ATM	227	26	34.4471	0.22871
CDKN2B	668	SMARCA4	230	47	34.9023	0.0662287
CDKN2B	668	RB1	227	9	34.4471	4.55887e-07
CDKN2B	668	KEAP1	271	46	41.124	0.516394
CDKN2B	668	CTNNB1	197	48	29.8946	0.00185381
CDKN2B	668	MYC	417	49	63.2794	0.0951342
CDKN2B	668	NKX2-1	432	56	65.5557	0.322631
CDKN2B	668	MCL1	353	44	53.5675	0.277574
CDKN2B	668	MDM2	269	41	40.8205	1
CDKN2B	668	CCND1	134	19	20.3344	0.888878
CDKN2B	668	CCNE1	162	28	24.5834	0.575617
STK11	690	LRP1B	332	79	52.04	0.000271184
STK11	690	ARID1A	281	48	44.0459	0.623731
STK11	690	NF1	270	47	42.3217	0.57541
STK11	690	PTEN	113	10	17.7124	0.101271
STK11	690	ATM	227	54	35.5816	0.00347566
STK11	690	SMARCA4	230	80	36.0518	3.00712e-12
STK11	690	RB1	227	27	35.5816	0.204202
STK11	690	KEAP1	271	132	42.4784	3.21769e-38
STK11	690	CTNNB1	197	31	30.8791	1
STK11	690	MYC	417	105	65.3635	8.77851e-07
STK11	690	NKX2-1	432	50	67.7147	0.031784
STK11	690	MCL1	353	95	55.3317	1.41937e-07
STK11	690	MDM2	269	21	42.1649	0.000531628
STK11	690	CCND1	134	24	21.0041	0.602558
STK11	690	CCNE1	162	22	25.393	0.636804
LRP1B	332	ARID1A	281	35	21.1931	0.00744325
LRP1B	332	NF1	270	39	20.3635	0.000299844
LRP1B	332	PTEN	113	16	8.52249	0.0414236
LRP1B	332	ATM	227	21	17.1204	0.444675
LRP1B	332	SMARCA4	230	44	17.3467	2.83227e-08
LRP1B	332	RB1	227	13	17.1204	0.502421
LRP1B	332	KEAP1	271	38	20.4389	0.000530388
LRP1B	332	CTNNB1	197	13	14.8578	0.869634
LRP1B	332	MYC	417	43	31.4502	0.0696828
LRP1B	332	NKX2-1	432	34	32.5816	0.865146
LRP1B	332	MCL1	353	41	26.6234	0.0128613
LRP1B	332	MDM2	269	10	20.2881	0.0312759
LRP1B	332	CCND1	134	15	10.1063	0.233762
LRP1B	332	CCNE1	162	16	12.2181	0.425181
ARID1A	281	NF1	270	23	17.2353	0.265616
ARID1A	281	PTEN	113	8	7.21331	0.792059
ARID1A	281	ATM	227	26	14.4905	0.00934167
ARID1A	281	SMARCA4	230	14	14.682	1
ARID1A	281	RB1	227	12	14.4905	0.68979
ARID1A	281	KEAP1	271	24	17.2992	0.17656
ARID1A	281	CTNNB1	197	8	12.5754	0.358512
ARID1A	281	MYC	417	31	26.619	0.483089
ARID1A	281	NKX2-1	432	16	27.5766	0.0410545
ARID1A	281	MCL1	353	29	22.5336	0.246948
ARID1A	281	MDM2	269	16	17.1715	0.956359
ARID1A	281	CCND1	134	16	8.55384	0.0426285
ARID1A	281	CCNE1	162	18	10.3412	0.0483638
NF1	270	PTEN	113	8	6.93094	0.787692
NF1	270	ATM	227	19	13.9232	0.264521
NF1	270	SMARCA4	230	11	14.1072	0.610197
NF1	270	RB1	227	9	13.9232	0.318165
NF1	270	KEAP1	271	18	16.622	0.792409
NF1	270	CTNNB1	197	10	12.0831	0.752157
NF1	270	MYC	417	26	25.577	0.972015
NF1	270	NKX2-1	432	27	26.497	0.970839
NF1	270	MCL1	353	28	21.6515	0.276888
NF1	270	MDM2	269	12	16.4993	0.434498
NF1	270	CCND1	134	9	8.21899	0.808141
NF1	270	CCNE1	162	11	9.93639	0.831478
PTEN	113	ATM	227	5	5.82712	1
PTEN	113	SMARCA4	230	5	5.90413	1
PTEN	113	RB1	227	12	5.82712	0.0378727
PTEN	113	KEAP1	271	7	6.95661	1
PTEN	113	CTNNB1	197	5	5.05702	1
PTEN	113	MYC	417	13	10.7045	0.553635
PTEN	113	NKX2-1	432	14	11.0895	0.475808
PTEN	113	MCL1	353	6	9.06156	0.515842
PTEN	113	MDM2	269	1	6.90527	0.03698
PTEN	113	CCND1	134	2	3.4398	0.695914
PTEN	113	CCNE1	162	7	4.15856	0.313661
ATM	227	SMARCA4	230	8	11.8605	0.425889
ATM	227	RB1	227	6	11.7058	0.172273
ATM	227	KEAP1	271	10	13.9748	0.459561
ATM	227	CTNNB1	197	5	10.1588	0.182743
ATM	227	MYC	417	20	21.5036	0.893242
ATM	227	NKX2-1	432	44	22.2771	3.21902e-05
ATM	227	MCL1	353	27	18.2033	0.0718637
ATM	227	MDM2	269	11	13.8716	0.611273
ATM	227	CCND1	134	10	6.91004	0.358398
ATM	227	CCNE1	162	3	8.35393	0.135035
SMARCA4	230	RB1	227	15	11.8605	0.492688
SMARCA4	230	KEAP1	271	37	14.1595	2.43811e-07
SMARCA4	230	CTNNB1	197	6	10.293	0.306089
SMARCA4	230	MYC	417	12	21.7878	0.0489552
SMARCA4	230	NKX2-1	432	11	22.5716	0.0177017
SMARCA4	230	MCL1	353	22	18.4439	0.516433
SMARCA4	230	MDM2	269	6	14.055	0.052801
SMARCA4	230	CCND1	134	14	7.00136	0.0382129
SMARCA4	230	CCNE1	162	10	8.46433	0.692705
RB1	227	KEAP1	271	15	13.9748	0.865575
RB1	227	CTNNB1	197	3	10.1588	0.0330235
RB1	227	MYC	417	21	21.5036	1
RB1	227	NKX2-1	432	32	22.2771	0.0663997
RB1	227	MCL1	353	32	18.2033	0.00489421
RB1	227	MDM2	269	5	13.8716	0.0254787
RB1	227	CCND1	134	2	6.91004	0.0989579
RB1	227	CCNE1	162	22	8.35393	0.000115869
KEAP1	271	CTNNB1	197	11	12.1279	0.942019
KEAP1	271	MYC	417	42	25.6717	0.00403749
KEAP1	271	NKX2-1	432	12	26.5952	0.0035873
KEAP1	271	MCL1	353	38	21.7317	0.00177088
KEAP1	271	MDM2	269	9	16.5604	0.102112
KEAP1	271	CCND1	134	5	8.24943	0.493674
KEAP1	271	CCNE1	162	7	9.97319	0.54274
CTNNB1	197	MYC	417	13	18.6617	0.287767
CTNNB1	197	NKX2-1	432	13	19.333	0.246184
CTNNB1	197	MCL1	353	12	15.7976	0.487662
CTNNB1	197	MDM2	269	14	12.0384	0.658135
CTNNB1	197	CCND1	134	3	5.99682	0.426502
CTNNB1	197	CCNE1	162	3	7.24989	0.216447
MYC	417	NKX2-1	432	83	40.9232	6.51601e-10
MYC	417	MCL1	353	71	33.4396	1.68241e-09
MYC	417	MDM2	269	34	25.4823	0.166412
MYC	417	CCND1	134	33	12.6938	9.98275e-07
MYC	417	CCNE1	162	21	15.3462	0.232993
NKX2-1	432	MCL1	353	55	34.6424	0.00138003
NKX2-1	432	MDM2	269	38	26.3989	0.0469107
NKX2-1	432	CCND1	134	29	13.1504	0.000195694
NKX2-1	432	CCNE1	162	29	15.8982	0.00377226
MCL1	353	MDM2	269	6	21.5713	0.000297123
MCL1	353	CCND1	134	22	10.7456	0.00344935
MCL1	353	CCNE1	162	23	12.9909	0.0196118
MDM2	269	CCND1	134	20	8.18855	0.000620543
MDM2	269	CCNE1	162	6	9.89959	0.372331
CCND1	134	CCNE1	162	5	4.93139	0.893099
